# Supplementary material for: Strain and electric field modulated electronic structure of two-dimensional SiP(SiAs)/GeS van der Waals heterostructures
Source: Royal Society of Chemistry journal article supplement (doi:10.1039/c9tc03048d), 2019-01-01
Supplement: c9tc03048d1.pdf [file c9tc03048d1.pdf]

## Supplementary Information

### **Strain and Electric Field Modulated Electronic Structure of Two-dimensional SiP(SiAs)/GeS van der Waals Heterostructures**

Yingmei Zhu<sup>1</sup>, Xiaocha Wang<sup>1,\*</sup>, Wenbo Mi<sup>2</sup>

*<sup>1</sup>Tianjin Key Laboratory of Film Electronic & Communicate Devices, School of Electrical and  
Electronic Engineering, Tianjin University of Technology, Tianjin 300384, China*

*<sup>2</sup>Tianjin Key Laboratory of Low Dimensional Materials Physics and Preparation Technology,  
School of Science, Tianjin University, Tianjin 300354, China*

---

\*Author to whom all correspondence should be addressed.

E-mail: [wangxc@email.tjut.edu.cn](mailto:wangxc@email.tjut.edu.cn)

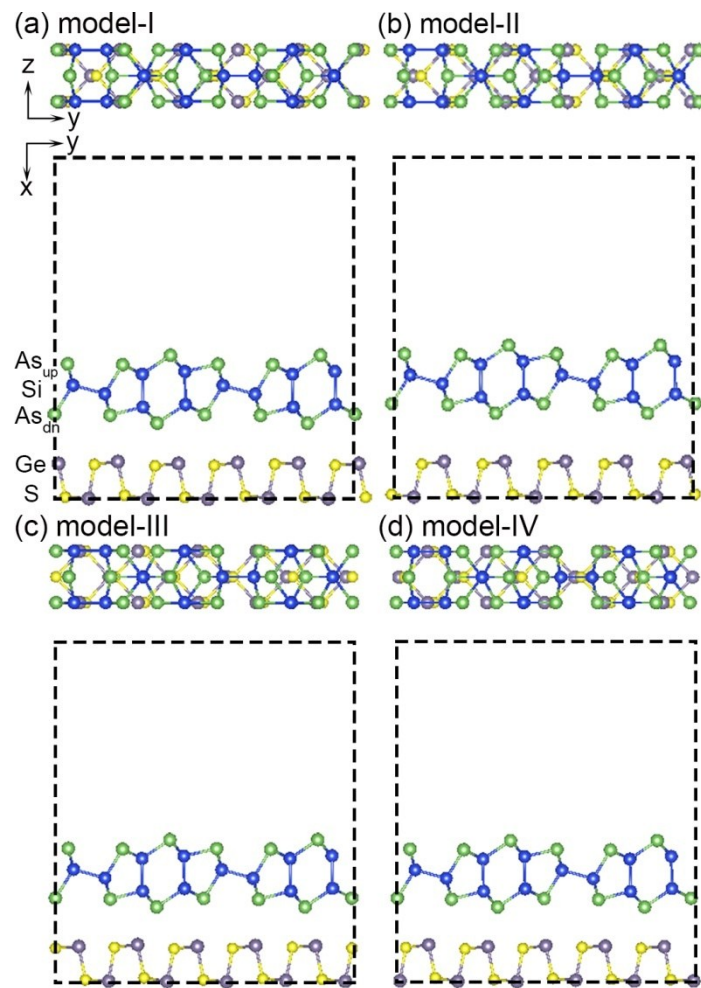

**Fig. S1.** Top and side views of (a) model-I, (b) model-II, (c) model-III and (d) model-IV for SiAs/GeS heterostructures.
